# Supplementary material
Source: Springer Nature journal article supplement (https://www.springermedizin.de/resource/supplementary/12884_2014_1291_MOESM5_ESM.pdf/9458672)
Supplement: MOESM5 [file 9458672]

**SITE DIRECTOR**

**PROJECT DIRECTOR**

**Research  
Nutritionist**

**DATA MANAGEMENT**  
Network Manager  
Data Entry Clerk (x3)

**OPERATIONS**  
Administrator  
Driver  
Security  
Housekeeping  
Logistician

**FIELD TEAM (cluster level)**

**Field Coordinator**

**Field Supervisors (x2)**  
(Home)

**Home Visitor Research  
Assistant (x15)**

**Field Supervisor**  
(Assessment/Hospital Liaison)

**Assessment Teams**

- 6 Anthropometrists
- 2 Phlebotomists
- 1 Laboratory Technician
